# Supplementary material for: Chemical Synthesis, Safety and Efficacy of Antihypertensive Candidate Drug 221s (2,9)
Source: MDPI journal article supplement (doi:10.3390/molecules28134975), 2023-06-25
Supplement: s1 [file s1]

# Supplementary materials

## Chemical Synthesis, Safety and Efficacy of Antihypertensive Candidate Drug 221s (2,9)

compound 1

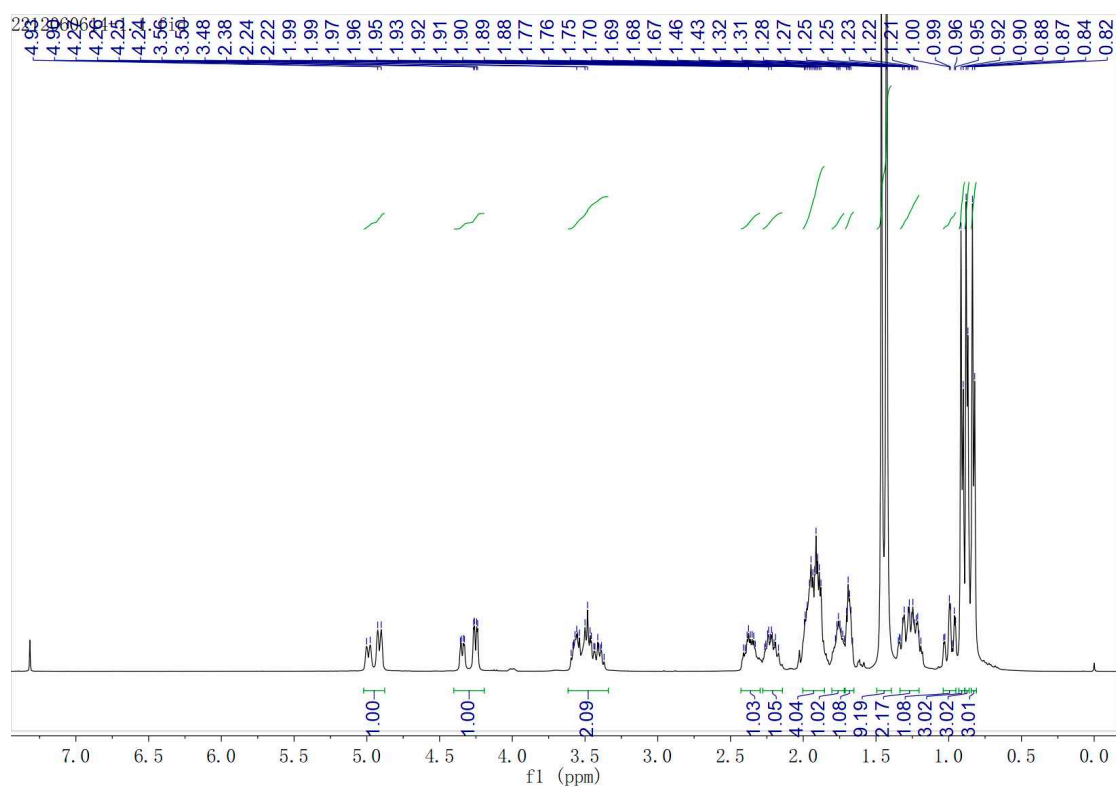

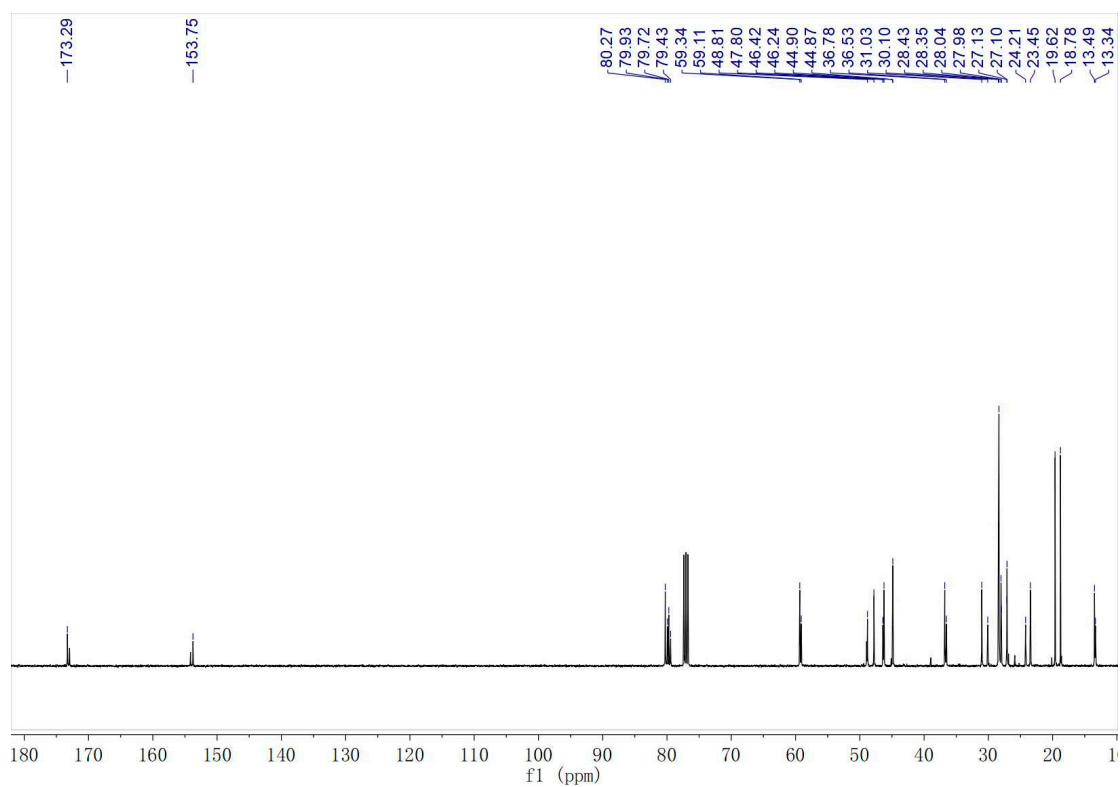

1 #13 RT: 0.17 AV: 1 NL: 7.85E8  
T: FTMS + p ESI Full ms [50.0000-750.0000]

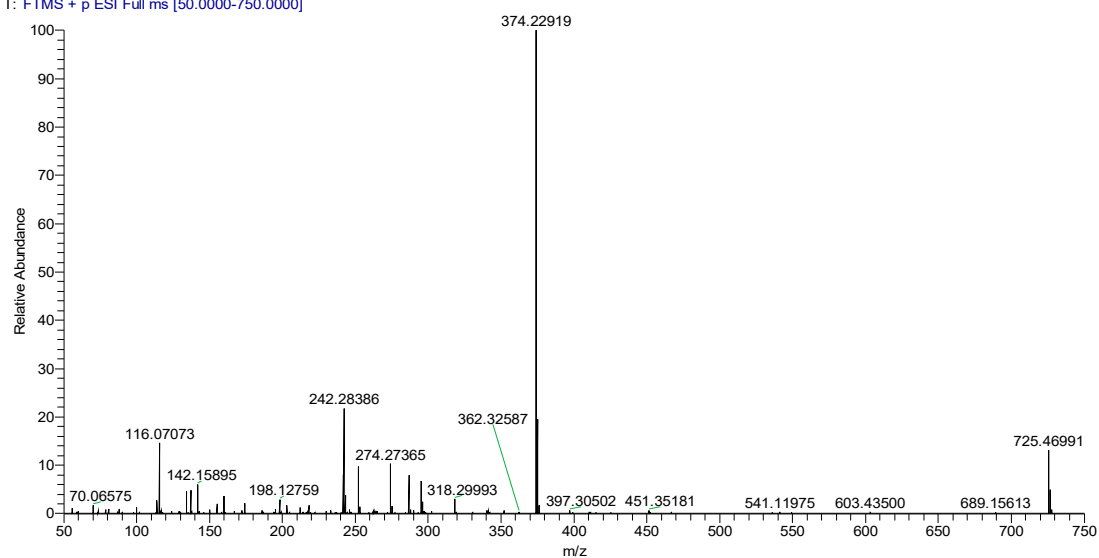

compound 3

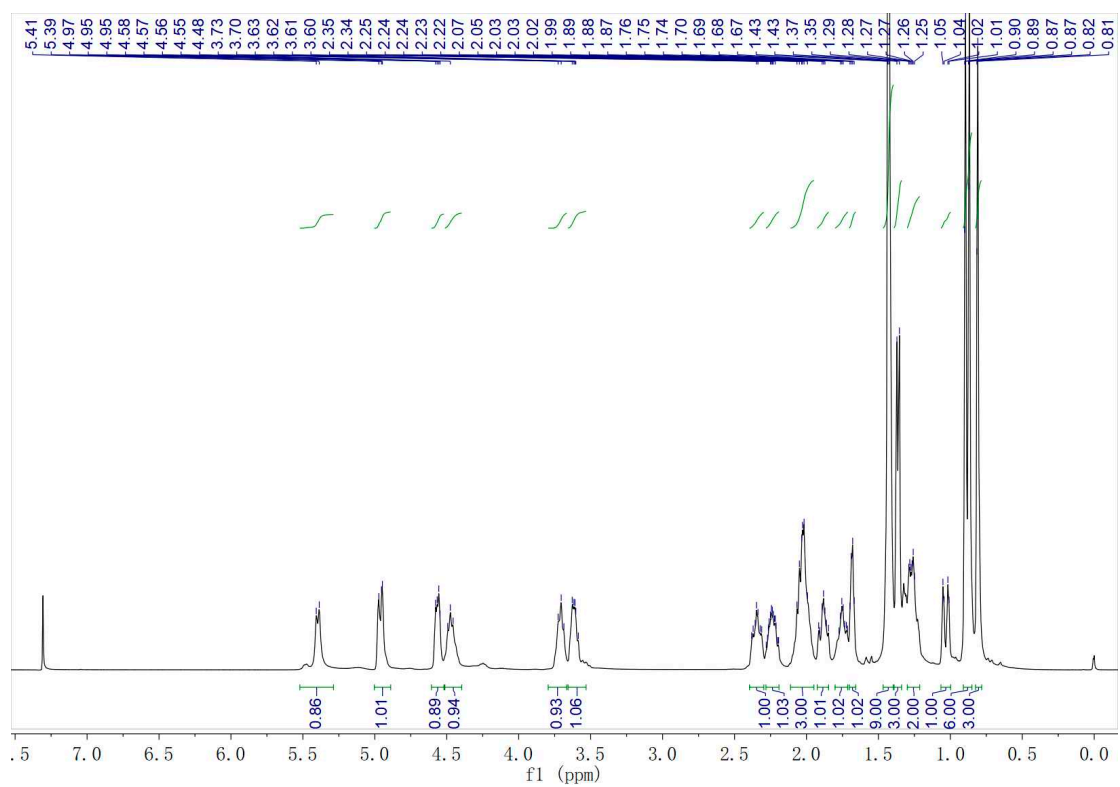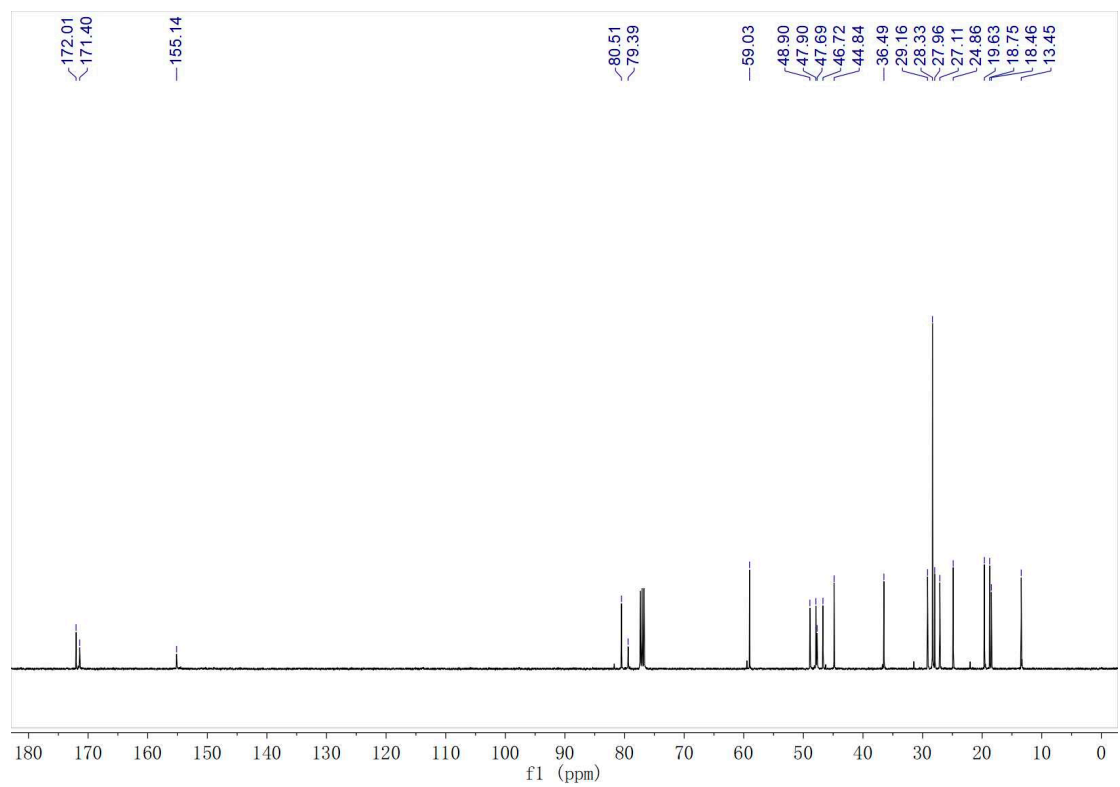

2 #13 RT: 0.18 AV: 1 NL: 6.40E7  
T: FTMS + p ESI Full ms [50.0000-750.0000]

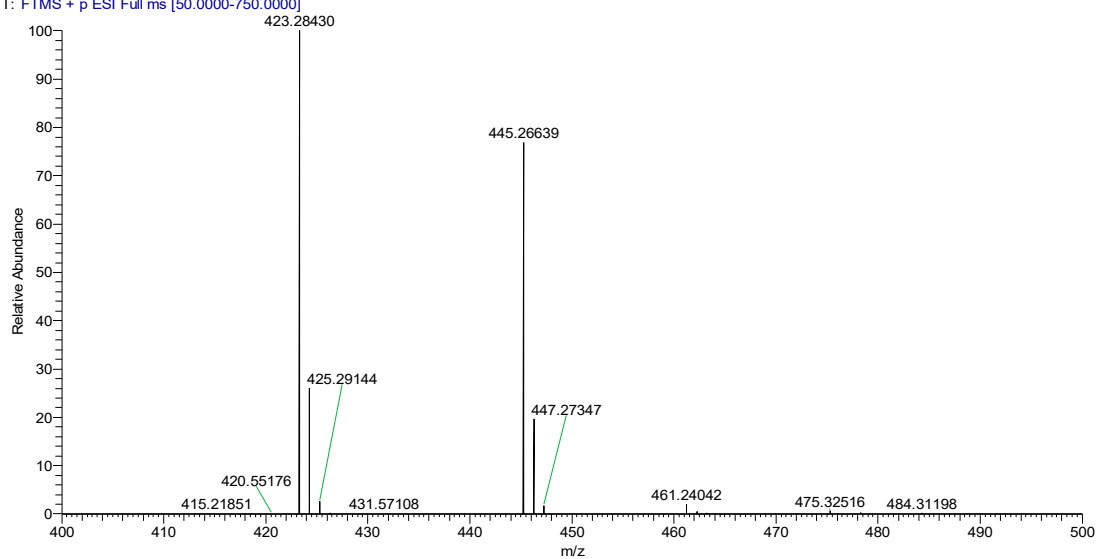

221s (2,9)

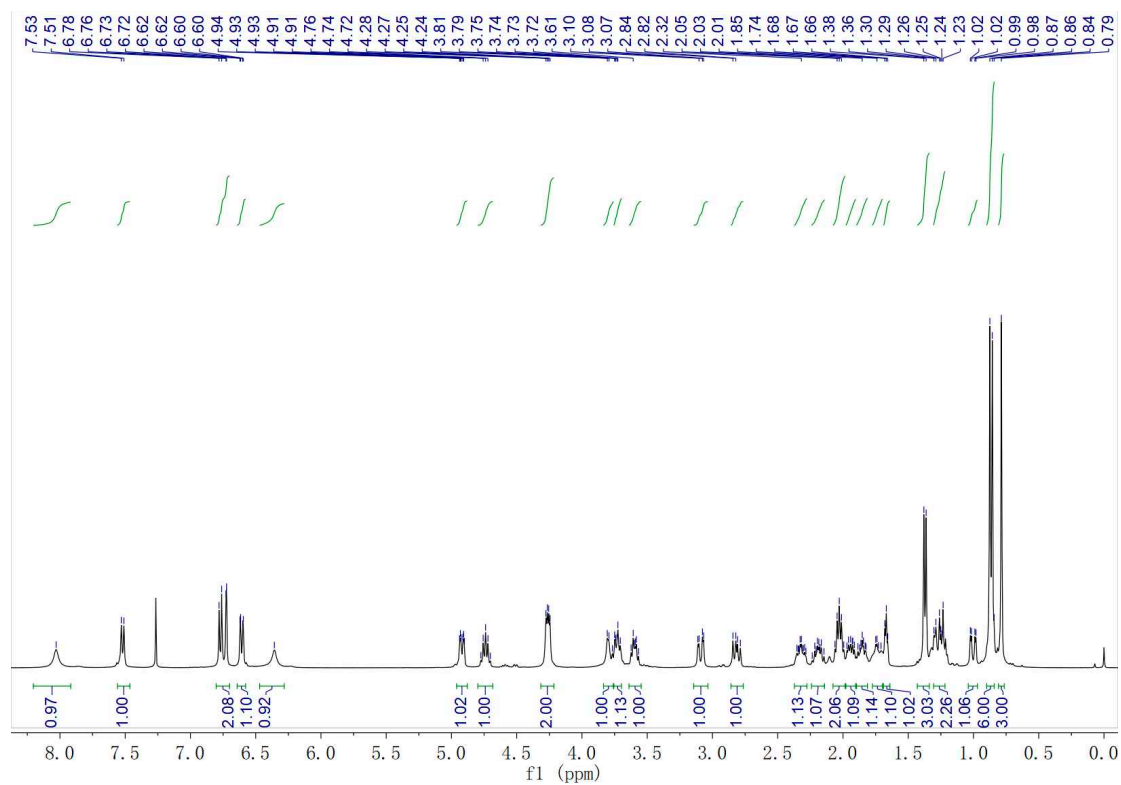

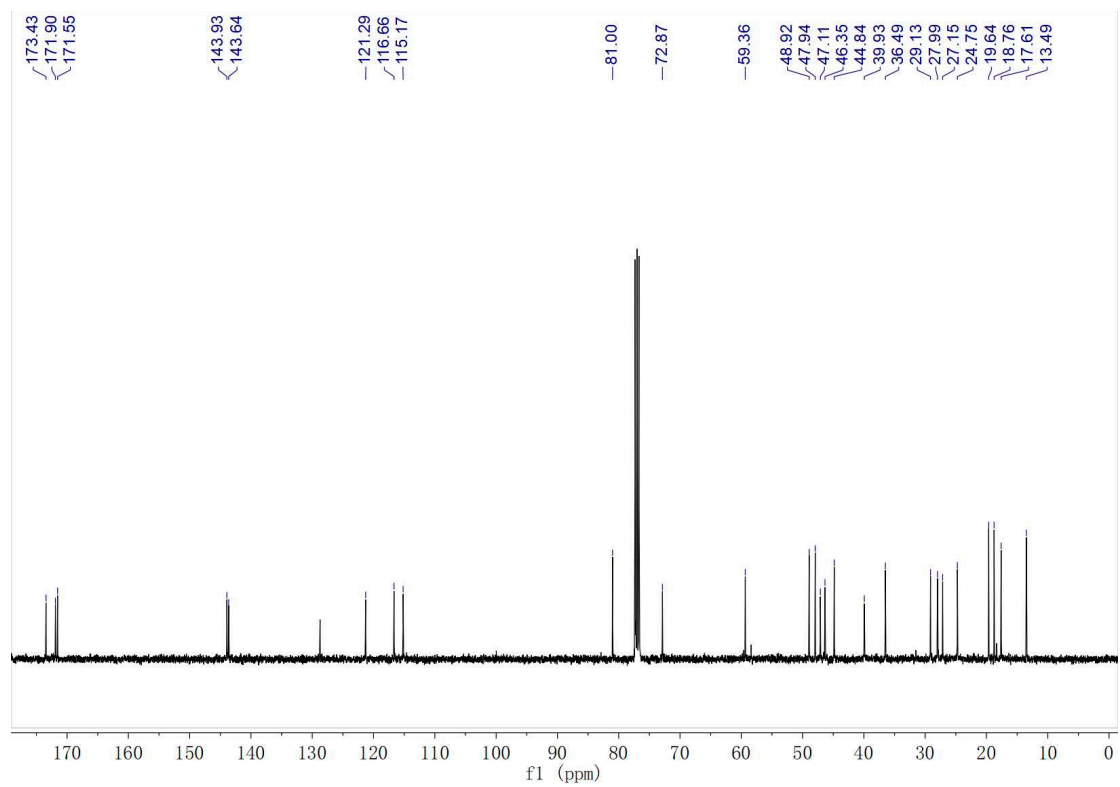

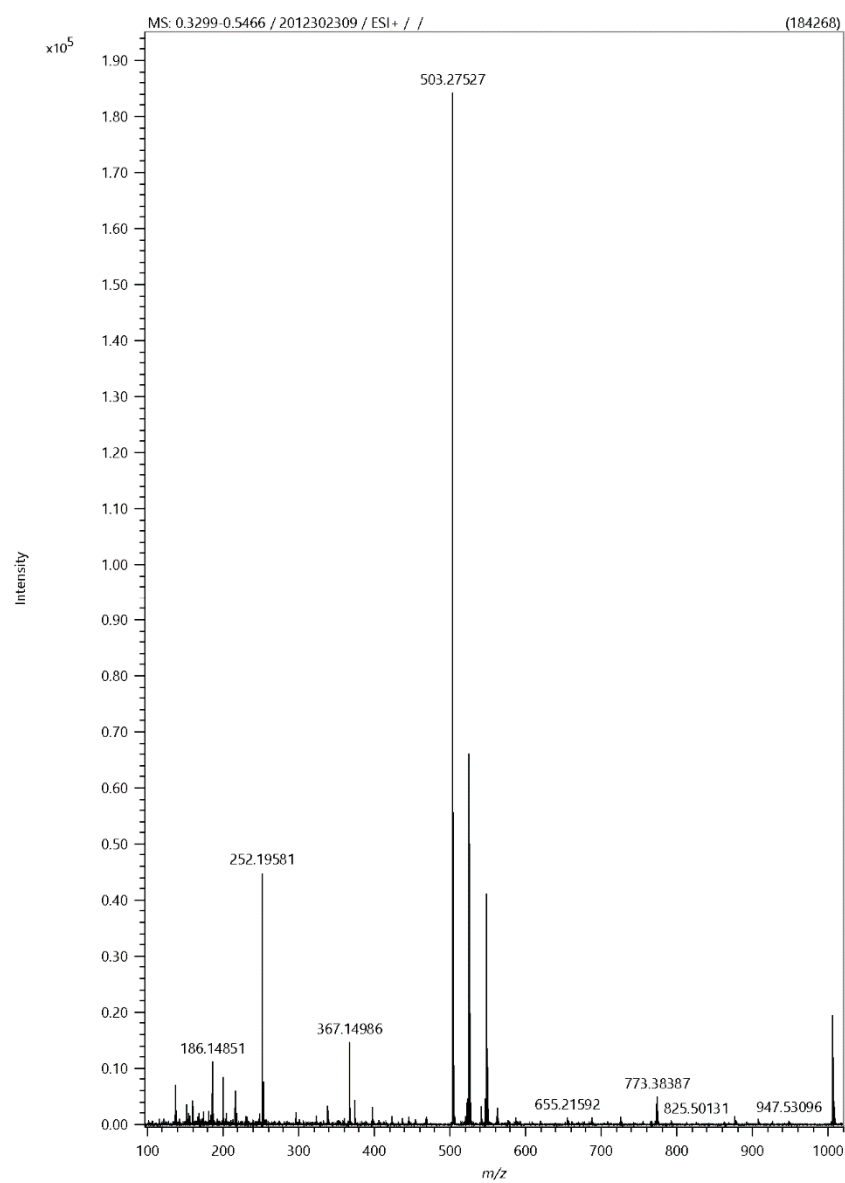

1 / 28

Figure S1.  $^1\text{H}$ NMR,  $^{13}\text{C}$ NMR and mass spectra of compounds

Table S1. Optimal elution gradient of 221s (2,9)

| T(min) | A (Acetonitrile) | B (0.2% Formic acid) |
|--------|------------------|----------------------|
| 0      | 25               | 75                   |
| 9      | 32               | 68                   |
| 10     | 45               | 55                   |
| 40     | 45               | 55                   |

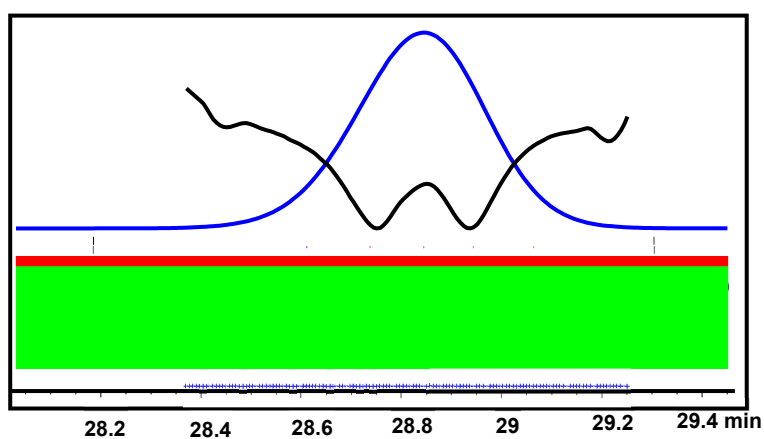

Figure S2. chromatographic peak purity analysis

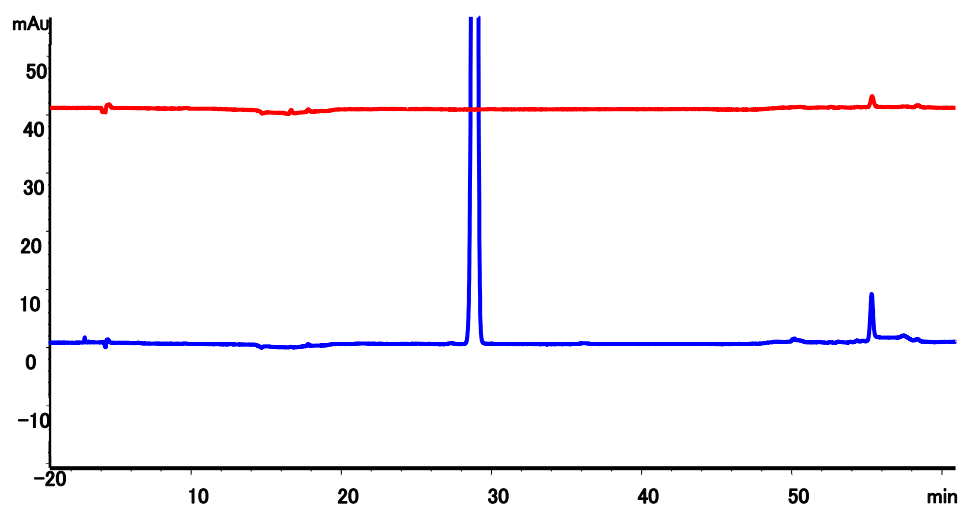

Figure S3. 221s (2,9) chromatogram, sample size: 20uL

Table S2. Normalized method was used to calculate the content of control substance

| $t(\text{min})$ | Peak area | Relative content (%) |
|-----------------|-----------|----------------------|
| 27.329          | 5.7       | 0.074                |
| 28.911          | 7743.6    | 99.87                |
| 36.181          | 4.2       | 0.054                |

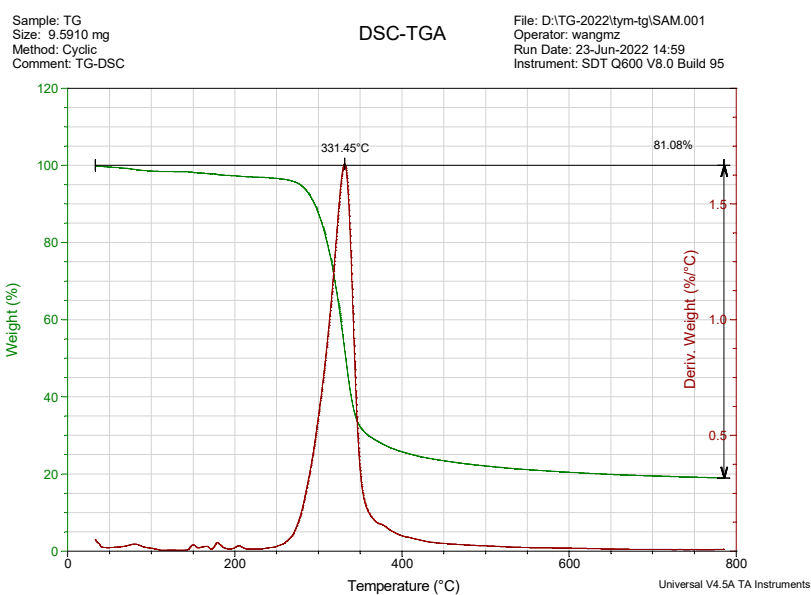

Figure S4. TGA-DTGA curve of 221s (2,9)

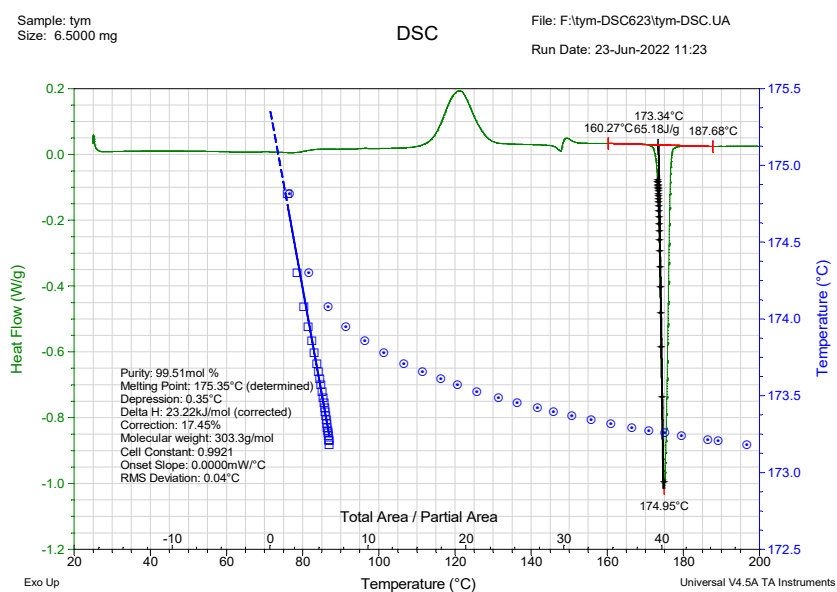

Figure S5. Purity Analysis Results of 221s (2,9)
